# Thermal Fogging with Disinfectant Didecyl Dimethyl Ammonium Bromide

## Effectively Kills A Coronavirus, An Influenza Virus and Two Indicator Bacteria in Subzero Cold-Chain Environment

Qiaoyun Hu <sup>a,b</sup>, Pei Ma <sup>a</sup>, Junyi Hong <sup>a</sup>, Yulong Wang <sup>a</sup>, Dong Huang <sup>a</sup>, Yadi Tan <sup>a</sup>, Zhengjun Yu <sup>a\*</sup>

<sup>a</sup> Hunan Sino-Clean Bio Institute, 001-401 Jinzhou North Road, Ningxiang High-tech Zone, Hunan Province, 410600, China

<sup>b</sup> Hunan Center for Animal Diseases Control and Prevention, 708 Changsha Avenue, Changsha, Hunan province, 410014, China

\*Corresponding author at: 001-401 Jinzhou North Road, High-tech Zone, Ningxiang, Hunan Province, 410600, China. Email address: yuzhengjun\_scbio@163.com (Z. Yu)

# Abstract

Background: The origin of several local COVID-19 outbreaks in China in 2020 were confirmed to be frozen food or packages contaminated with SARS-CoV-2, revealing the lack of effective disinfection measures in the frozen food chain.

Objective: To evaluate the disinfection efficacy at -20°C of a recently marketed thermal fogging disinfection product, with disinfectant-antifreeze combination being didecyl dimethyl ammonium bromide (DDAB) - propylene glycol (PPG).

Method: Carriers with porcine epidemic diarrhea virus (PEDV) YN1, a coronavirus, and a swine influenza virus H1N1 (SIV-H1N1), and three indicator bacteria, *E. coli*, *S. aureus*, and *B. subtilis* endospores, were respectively placed in a -20°C freezer warehouse with or without DDAB-PPG fogging and activities of the microorganisms were tested.

Results: At -20°C, DDAB-PPG fogging, which fully settles in 3.5-4.5 hours, fully inactivated PEDV of  $10^{-3.5}$  TCID<sub>50</sub>/0.1ml and SIV-H1N1 of  $2^6$  hemagglutination titer within 15-30 min, and inactivated *S. aureus* and *E. coli* vegetative cells ( $10^6$ /ml) within 15 or 60 min, respectively, but had little effect on *B. subtilis* spores. The bactericidal effect lasted at least 3 hours for bacteria on carrier plates and for 6 hours for airborne bacteria.

Conclusions: A practical subzero temperature disinfection technology was confirmed its efficacy in killing enveloped viruses and vegetative bacteria. It would help to meet the urgent public health need of environmental disinfection in frozen food logistics against pandemic and other potential pathogens and to enhance national and international biosecurity.

Keywords: frozen, cold-chain, disinfection, thermal fogging, coronavirus, influenza virus

## 42 Highlights

43

- 44 • First report of efficacy of disinfectant didecyl dimethyl ammonium bromide (DDAB) at subzero
- 45 temperatures

46

- 47 • The customized thermal fogging machine makes fine droplets of DDAB-propylene glycol (PPG) fog
- 48 which can suspend for ~4 hours at -20°C

49

- 50 • DDAB-PPG thermal fogging at -20°C effectively inactivated a coronavirus and an influenza virus

51

- 52 • DDAB-PPG thermal fogging at -20°C for effectively killed *S. aureus* and *E. coli*

53

- 54 • DDAB-PPG thermal fogging at -20°C inactivated airborne microorganism for up to 6 h

# 1. Introduction:

The objective of this study is to evaluate the disinfection efficacy of a thermal fogging method in a temperature for frozen foods. This is an urgent market need because SARS-CoV-2 present in frozen food<sup>1</sup> or packages<sup>2</sup> has been identified as the origin of transmission in some recent local outbreaks of COVID-19 in China.

Considering that high SARS-CoV-2 infection rate was found among meat processing plant workers<sup>3</sup> and fishery workers<sup>4</sup> early in the pandemic, and SARS-CoV-2 can survive for a long time under cold temperatures<sup>5,6</sup>, these constitute a full cycle of human-to-frozen food-to-human transmission of SARS-CoV-2, which reveal both an important public health threat and a weakness in the disinfection procedures of the frozen food cold-chain.

As frozen temperature is inhibitory for growth of bacteria and viruses, and most food cold-chain related viral pathogens impact the gastrointestinal system and are often linked to incomplete cooking of food<sup>7</sup>, and none about respiratory diseases. Routine disinfection practice has been insufficient if not absent in some critical links of the frozen food cold-chain operations. But the new finding that human respiratory viruses are transmitted via frozen food calls for a safer cold-chain with effective disinfection measures<sup>8</sup>.

Facing the situation, China issued a number of technical guidances on food cold-chain disinfection<sup>9</sup>, including *Technical guidance for prevention and control of COVID-19 in cold food production chain* and *Technical guidance for disinfection in cold food production chain to prevent and control COVID-19* Guidance [2020]-245 (Oct 16, 2020)<sup>10</sup> and *Work plan for preventive and comprehensive disinfection of imported cold-chain food* Guidance [2020]-255 (Nov 8, 2020)<sup>11</sup>. A key focus of these guidelines is preventive disinfection of food product packaging and interior surfaces of shipping containers, particularly in the frozen food import chain from port to market, instead of food content within packaging. These guidelines require disinfection be carried out at critical steps and efficacy of disinfection checked, and call for "sum up good

experience and practice in SARS-CoV-2 detection and disinfection" instead of giving specifics on how to disinfect, particularly for the frozen chain. Thus it can be said that the disinfection practices in the frozen food chain are still being explored and optimized. Many disinfection products have been used since the COVID-19 pandemic, but data are needed to support their efficacy and continued use in the frozen food cold-chain.

Therefore, we carried out disinfection efficacy study of a recently marketed disinfection product suitable for freezing temperatures. It uses a customized thermal fogging machine to deliver a disinfectant solution together with a matching fogging fluid & antifreeze. The disinfectant is didecyl dimethyl ammonium bromide (DDAB), and the fogging fluid & antifreeze is propylene glycol (PPG). DDAB is among the most widely used disinfectants worldwide and is on the recommended cold-chain disinfectant list by health authorities. Two field strain viruses from the coronavirus family and influenza virus family, and three indicator bacteria, *E. coli*, *S. aureus*, and *B. subtilis* endospore were tested in a -20°C food industry freezer warehouse. The data would support informed choices for cold-chain disinfection practice.

## 2. Material and Methods

### 2.1 Indicator bacteria

The *Escherichia coli* strain ATCC8099, *Staphylococcus aureus* strain ATCC6538 *Bacillus subtilis* spores (Guangdong Microbial Culture Collection or GDMCC1.372) were used.

### 2.2 Viruses

The porcine epidemic diarrhea virus (PEDV) field strain was a gift from Dr. Qigai He of Huazhong Agriculture University, and its passage and Median tissue culture infective dose (TCID<sub>50</sub>) assay were carried out in Vero cells<sup>12</sup>. The swine influenza virus (SIV) H1N1 A/S/TJ/04 strain was a gift from Dr. Meilin Jin of Huazhong Agriculture University and its passage and infectivity titer determination were carried out on embryonated eggs<sup>13</sup>.

109

### 110 2.3 Disinfectants and thermal fogging at -20°C

111 The Huanying 360 thermal fogging machine uses a didecyl dimethyl ammonium bromide (DDAB) water  
 112 solution of 50g/100 ml and a 50% (v/v) propylene glycol (PPG) fogging and anti-freeze fluid with 0.1%  
 113 lemon fragrance limonene. The combination is referred as HY-360 DDAB-PPG. The machine is  
 114 programmable for duration of fogging. After setting up and powered on, it runs and stops automatically.  
 115 The concentration of DDAB-PPG fog used in the study are listed in Table 1, which included two  
 116 concentrations, ~0.4 g/m<sup>3</sup> and ~1.0 g/m<sup>3</sup>, corresponding to ~8 or ~20 min of fogging. A photo of the  
 117 fogging machine in operation is shown in Figure 1.

118

119 Table 1 Volume of the -20°C freezer warehouses and fogging doses

| Disinfection experiment | Figure   | Volume (m <sup>3</sup> ) | DDAB used (ml) | PPG used (ml) | DDAB (ml/m <sup>3</sup> ) | DDAB (g/m <sup>3</sup> ) |
|-------------------------|----------|--------------------------|----------------|---------------|---------------------------|--------------------------|
| PEDV in 1 h             | Figure 3 | 168                      | 330            | 400           | 1.96                      | 0.98                     |
| SIV in 1 h              | Figure 3 | 97.44                    | 80             | 120           | 0.82                      | 0.41                     |
| 3 bacteria in 1 h       | Figure 4 | 97.44                    | 80             | 110           | 0.82                      | 0.41                     |
| 3 bacteria in 1 h       | Figure 4 | 273.83                   | 550            | 600           | 2.01                      | 1.00                     |
| bacteria in 8 h         | Figure 5 | 273.83                   | 550            | 600           | 2.01                      | 1.00                     |

120

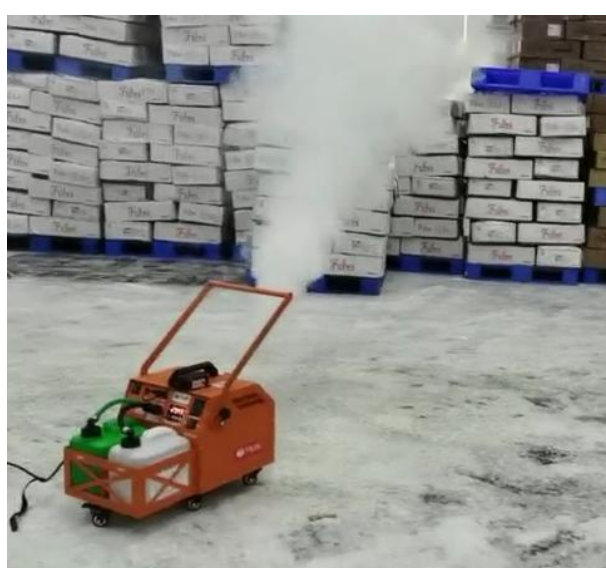

121

Figure 1. A photo of Huanying 360-DDAB thermal fogging machine (lower right) started fogging operation in a freezer warehouse (This is from a video of fogging which can be provided as supplementary data).

#### 2.4 Evaluating the efficacy of disinfectant fogging on PEDV at -20°C

The PEDV virus stock was prepared to be  $10^{-3.5}$  TCID<sub>50</sub>/0.1ml. Carrier polystyrene plates were prepared by dropping 60 µl virus stock in each clean plate and let air dry, which were placed either on the floor or on a shelf in the freezer warehouse and exposed to disinfection thermal fogging for 15-60 min as indicated. Some plates served as freeze-only controls. The plates were taken out, rinsed with 1.2 ml DMEM (containing 2% penicillin and streptomycin), and the eluents were collected and stored at -80°C freezer for TCID<sub>50</sub> assay later, which is done according to previous described method.

#### 2.5 Evaluating the efficacy of disinfectant fogging on SIV H1N1 at -20°C

SIV H1N1 stock of HA titer  $1 : 2^5$  was diluted 2 fold with sterile saline, polystyrene plates were prepared by dropping 50 µl virus stock in each plate and let air dry. The carrier plates were placed on different locations in the freezer warehouse as indicated and exposed to disinfectant thermal fogging for 15-60 min as indicated. Some plates were served as freeze-only controls. The plates were taken out, each was rinsed with 1.5 ml sterile saline, and the eluents were inoculated at 0.4 ml/each onto three 10-day chicken embryos and cultured at 37°C for 72 h. Then the eggs were put into -20°C for 1 h, and the allantoic fluids were collected, 2 fold serial diluted with saline and used for hemagglutination assay with chicken erythrocytes. The highest dilution with erythrocytes agglutination was recorded as the rough HA titer of that sample. To make titers from different assay runs comparable, the mean titer of the stock assayed in each run was divided by  $2^5$  to obtain a normalization number and all the titers obtained were divided by this number.

#### 2.6 Bacteria disinfection experiments at -20°C

*E. coli*, and *S. aureus* were cultured in 10-20 ml TSB (Soybean-casein-digest) medium overnight in 50 ml conical tubes, counted, and adjusted to  $10^6$  cfu/ml. For *B. subtilis* spores, dry powder were resuspended

149 with 0.85% saline, counted, and then diluted to  $10^6$  cfu/ml saline. Then 100  $\mu$ l each was spread on a 60 mm  
150 diameter empty PS plate, let air fry in biosafety hood and then covered. Carrier plates were placed in a -  
151 20°C freezer warehouse either on the floor (2 sites) or on a shelf (1.2 m height, 2 sites) at 2-3 plates each  
152 site, and exposed to disinfection fog for 15-60 min as indicated.

153

154 For evaluating the disinfection effect on airborne bacteria, clean plates were placed into the freezer  
155 warehouse at specified time, uncovered for 15 minutes to collect bacteria in the air, then covered, taken to  
156 the lab, rinsed with 1.0 ml sterile saline. The eluents were spread onto fresh sterile TSA-agar plates at 100  
157  $\mu$ l per plate and cultured overnight at 37°C for colonies counting to obtain cloning forming units (cfu).

158

## 159 2.7 Data analysis

160 The disinfection efficacy of DDAB fog for PEDV and the 3 bacteria were assessed by calculating the  $\log_{10}$   
161  $TCID_{50}/0.1\text{ml}$  or cfu and comparing fog exposed samples to the starting value or freezer only controls.  
162 Reduction of  $\geq 3\log_{10}$  is considered qualified. For SIV H1N1, the infectivity is measured by HA titer which is  
163 expressed as  $\log_2$  values. The figures were plotted with Plot2 Pro software.



### 164 3. Results

165 3.1 The DDAB-PPG fog produced by HY360 thermal fogging machine can suspend for several hours in the  
166 air.

167  
168 A series of photos were taken for the process of disinfection fogging with distance markers present (shown  
169 in Figure 2). The visibility at time 0, i.e, right after the machine finished fogging, was 0 at all conditions  
170 tested. It took ~3.5 h or ~4.5 h for the fogged rooms to restore visibility to > 5 meters at room temperature  
171 (RT) or -20°C, respectively.

172 Figure 2 Photos of HY-360 DDAB-PPG thermal fogging in a RT room or a -20°C freezer warehouse. The high dose is ~1 g DDAB/m<sup>3</sup>,

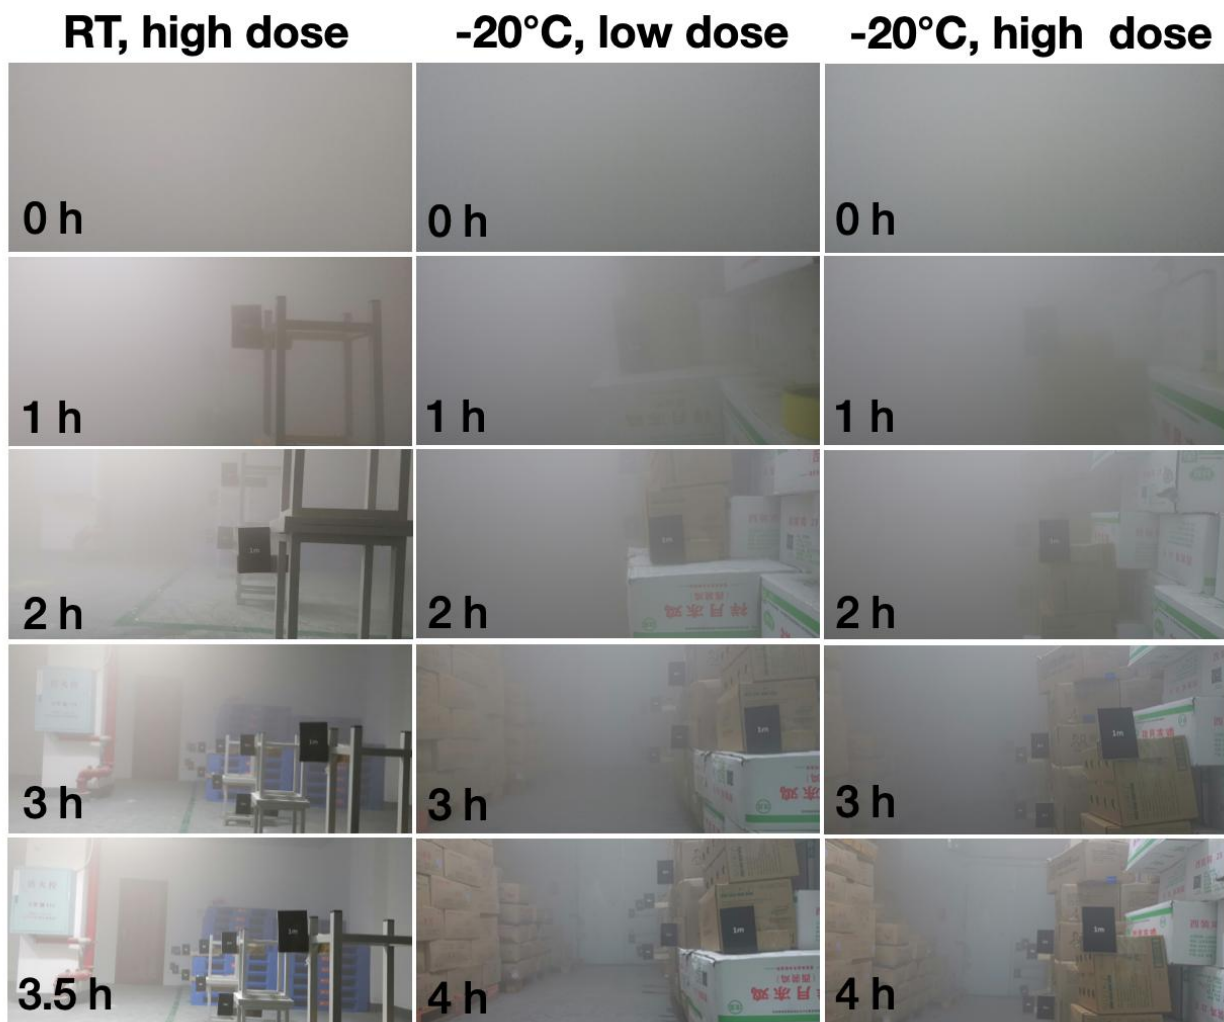

173 low dose is ~0.4 g DDAB/m<sup>3</sup>. Time 0 h is when the machine finished fogging.

174

The long hours of suspension gives the disinfectant fog ample time to act on all surfaces exposed and arrive hard-to-reach spots. In addition, based on the settling speed (5 meter high/~3.5 h at RT) the fog droplet size can be estimated by Stokes law, which should give the droplet size around 4~6  $\mu\text{m}^{14}$ .

### 3.2 DDAB thermal fogging has satisfactory virucidal efficacy at -20°C on PEDV and SIV-H1N1

Thermal fogging with ~1g/m<sup>3</sup> DDAB at -20°C completely inactivated PEDV with log<sub>10</sub> TCID<sub>50</sub> titer of 3.5, and SIV H1N1 with HA titer of 2<sup>5</sup>. The experiment was repeated with 0.4 g/m<sup>3</sup> DDAB for SIV H1N1, and full inactivation was achieved in all expect in 1 out of 6 sample at 15 min (Figure 3).

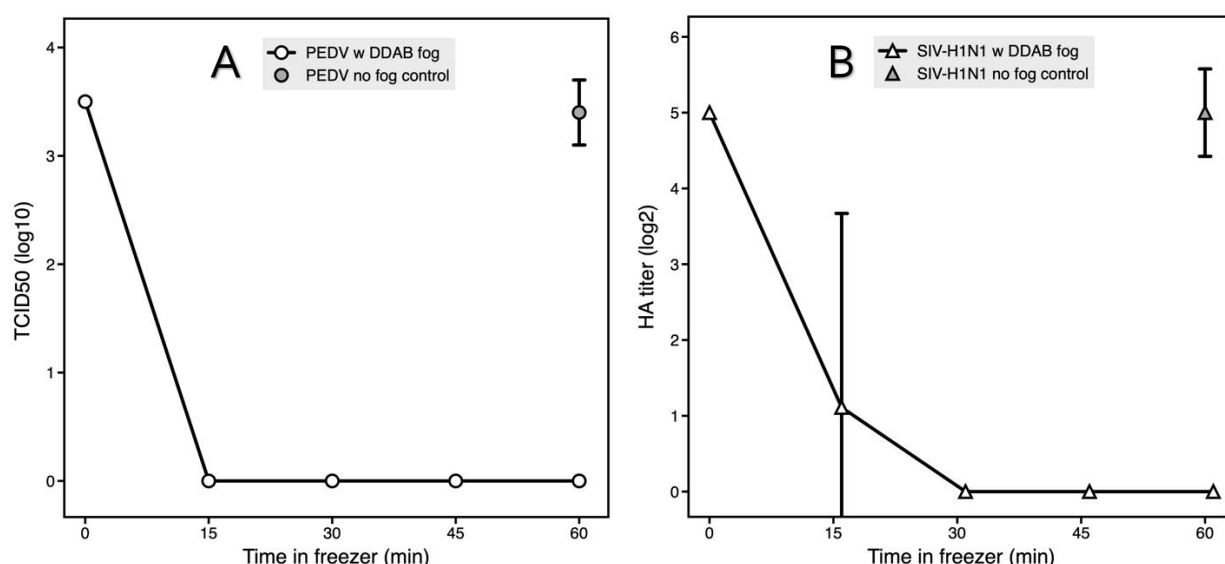

Figure 3 The virucidal effect of DDAB thermal fogging in a -20°C freezer warehouse. The fogging dose shown here was 1 g/m<sup>3</sup> for PEDV (A) and 0.4 g/m<sup>3</sup> for SIV H1N1(B). Data for 1g/m<sup>3</sup> fogging for SIV H1N1 were all 0 after 0 min and not shown. For each data points n=8 for PEDV and n=6 for SIV H1N1.

### 3.3 DDAB thermal fogging at -20°C effectively disinfected vegetative bacteria cells but not spores

Thermal fogging with 1.0 g or 0.4g/m<sup>3</sup> DDAB in a -20°C freezer warehouse produced ~5 log<sub>10</sub> reduction of bacteria *S. aureus* within 15 min for both doses, and >4 log<sub>10</sub> reduction of *E. coli* within 30 min or 60 min for the 1g and 0.4 g dose, respectively; as controls, the 60 min freezer exposure only samples had only <1.5

log<sub>10</sub> reduction. However, with *B. subtilis* spores, DDAB thermal fogging only resulted in 1-2 log<sub>10</sub> count reduction while freezer only control had similar count (Figure 4).

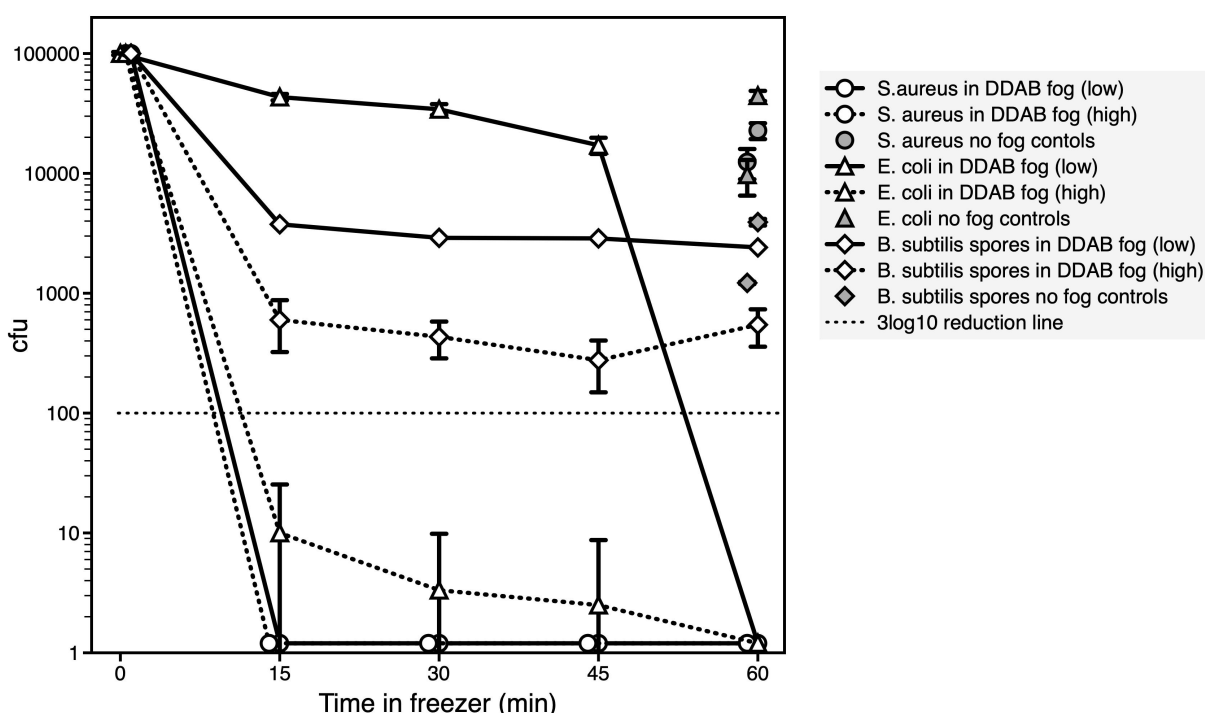

Figure 4 The bactericidal effect of DDAB fogging in a -20°C freezer warehouse. Each carrier plate was prepared with 10<sup>5</sup> bacteria vegetative cells (*S. aureus* and *E. coli*) or spores (*B. subtilis*) at time 0. Then placed in the freezer with or without fogging. n=12 for each data point. For cfu of 0, a value of 1.2 was assigned to be plot on the log scale plot.

### 3.4 The disinfection effect of DDAB thermal fogging lasts for 3-6 hours

One time DDAB thermal fogging showed 3 or 5 hours of lasting effect (>3 log<sub>10</sub> reduction) on *S. aureus* and *E. coli* bacteria, respectively (Fig. 5A) and can have up to 6 hours of effect in eliminating airborne bacteria in the freezer warehouse (Fig. 5B).

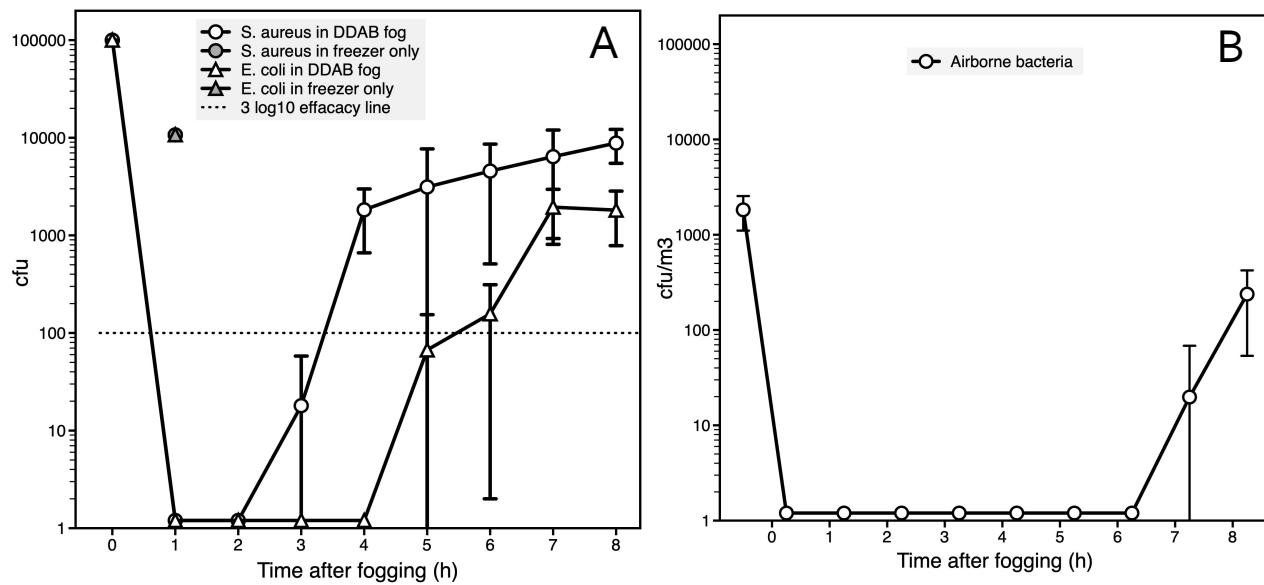

208 Figure 5 The lasting bactericidal effect of DDAB fogging at -20°C. The x value corresponds to time of sample taking out of freezer.  
209 In A, the carrier plates were exposed for 1 h (n=6); in B, the sterile plates were exposed for 15 min (n=6).

## 210 4 Discussions

211

212 The significance of the innovation reported is that it meets practical needs of disinfection in the food cold-  
213 chain industry under COVID-19 pandemic.

214

215 We here provide evidence that a practical innovation in disinfection based on optimizing existing  
216 technology could meet a global unmet need in subzero cold-chain disinfection, which can help to break the  
217 chain of SARS-CoV-2 transmission around the globe via cold chain so as to prevent re-emergence of the  
218 disease in areas already under control, and could also help to minimize the transmission of other human  
219 pathogens or bioterrorism agents through the cold-chain.

220

221 I DDAB is well known to kill viruses and bacteria by membrane disruption. However, its use in subzero  
222 temperatures had not been reported before. As it has higher efficiency at room temperature than at 4°C at  
223 inactivating viruses and vegetative bacteria<sup>15</sup>, it is necessary to test its disinfection efficacy at freezing  
224 temperatures, which means it first has to be delivered in a form and dose that do not freeze and suitable  
225 for frozen food cold-chain.

226

227 Disinfection with DDAB in subzero temperature was achieved by tailor-made optimization of thermal  
228 fogging technology. Although thermal fogging technology has been widely used in plant protection,  
229 vector control, disinfection and sanitation for decades, the technology usually requires optimization for  
230 specific purposes, both in terms of machine engineering and chemical selection which is related to the  
231 active agent to be delivered, such as pesticide or disinfectant, and the range of the fog to reach. For  
232 example, a study of atomizer optimization found that structural parameters of the atomizer of a fogging  
233 machine is key for the size of fog droplets, and with proper engineering, fog droplets could be controlled  
234 within a narrow range of 4.5~6.5  $\mu\text{m}$ <sup>16</sup>. The fogging fluid, or solvent, is also key for fogging features  
235 including fog volume and droplet size. The thermal fogging machine Huanying360 is designed and  
236 optimized specifically for DDAB fogging, the combination Huanying360-DDAB-PPG, the thermal fogging

237 machine plus disinfectant DDAB and fogging fluid propylene glycol, studied here was the best outcome  
 238 from many earlier explorations.  
 239  
 240 To our knowledge, this is a first report of efficacy of disinfectant DDAB at subzero temperatures,  
 241 regardless of bacteria or viruses. The two viruses tested, a coronavirus and an influenza virus, are within  
 242 the two most important virus families that have caused pandemics. The virucidal and bactericidal efficacy  
 243 of DDAB-PPG thermal fogging shown in figures 3-5 strongly support the effectiveness of the routine dose  
 244 ( $\sim 0.4 \text{ g/m}^3$ ) of DDAB-PPG thermal fogging for regular disinfection of surfaces in frozen food logistics. The  
 245 dose can be doubled to achieve stronger and faster effect if heavy contamination is suspected.  
 246  
 247 The advantages of the technology presented in this study are summarized below.  
 248  
 249 First, thermal fogging technology disperses the disinfectants throughout the air and into hard-to-reach  
 250 spots to achieve dead-zone free disinfection of exposed surfaces of all angles, and it is likely to be able to  
 251 eliminate all airborne viruses as the fine fog droplets permeate the whole space for hours.  
 252  
 253 Second, the product uses familiar chemicals with excellent safety profile.  
 254 The disinfectant chosen, DDAB, is officially approved and recommended in recent disinfection guidelines  
 255 for SARS-CoV-2 and had many years of use in numerous products. The fogging fluid, PPG, which also  
 256 function as antifreeze, is often used to make artificial smoke and mists for fire safety training, theatrical  
 257 performances and rock concerts, and has been recognized as safe<sup>17</sup>.  
 258  
 259 Third, minimal human labor is required for using the machine-reagent product set.  
 260 The reagents are ready to use and no dilution with water is required which reduces workload and chances  
 261 for errors. Once set and powered on, the machine will run and stop automatically. As seen in Figure 1 and 2,  
 262 the fogging projects at least 5 meters high and fogging from a single spot can fill a room of  $\sim 300 \text{ m}^3$  by

263 diffusion. For moderate spaces such as a shipping container or a truck, usually one machine operating from  
264 one spot is sufficient.

265

266 Fourth, it is economic for regular disinfection in industrial use, as has been proven in room temperature  
267 settings as compared to other options.

268

269 Regarding limitations of the technology, repeated fogging without cleaning could result in accumulation  
270 of antifreeze PPG which at high concentrations is slippery, therefore anti-slippery measures should be kept  
271 in mind in operation. In addition, the fogging machine is electrically powered, and therefore needs power  
272 supply to run, which is not as mobile as diesel fueled thermal fogging machines. Different thermal fogging  
273 machines can be chosen based on practical purposes and requirements.

274

## 275 5. Conclusions

276

277 Effective and practical subzero cold-chain disinfection of human viruses and other potential pathogens is  
278 an urgent and important public health and biosecurity need of the globe at the present and into the future.  
279 The HY360-DDAB-PPG fogging product reported in this study can meet this need with efficacy, safety,  
280 economy and practicality.

## 281 **Funding**

282 This work is supported by a Hunan province Key R&D program grant (No. 2019NK2181) from China Hunan  
283 Provincial Science and Technology Department, and a Key Technology R&D grant (No. HYYF-A019) from  
284 Hunan Sino-Clean Biotech Co., Ltd., China.

285

## 286 **CRedit authorship contribution statement**

287 **Qiaoyun Hu:** Conceptualization, Methodology, Investigation, Data Curation, Writing - Review & Editing.

288 **Pei Ma:** Investigation, Supervision, Resources, Data Curation, Writing - Original Draft.

289 **Yulong Wang:** Investigation, Methodology, Validation. **Dong Huang:** Investigation, Data Curation,

290 Validation. **Junyi Hong:** Investigation. **Yadi Tan:** Data Curation, Writing - Original Draft, Writing - Review

291 & Editing. **Zhengjun Yu:** Conceptualization, Funding acquisition, Resources, Supervision, Writing - Review

292 & Editing.

293

294

## 295 **Appendix A. Supplementary data**

296 Supplementary data is a 15 second video of thermal fogging disinfection in action in a freezer  
297 warehouse.



## 298 References

- <sup>1</sup> Pang et al., Cold-chain food contamination as the possible origin of COVID-19 resurgence in Beijing, *National Science Review*, Volume 7, Issue 12, December 2020, Pages 1861–1864, <https://doi.org/10.1093/nsr/nwaa264>
- <sup>2</sup> Liu et al., Cold-chain transportation in the frozen food industry may have caused a recurrence of COVID-19 cases in destination: Successful isolation of SARS-CoV-2 virus from the imported frozen cod package surface. *Biosafety and Health* 2020 ;2:199–201.
- <sup>3</sup> Dyal et al., COVID-19 Among Workers in Meat and Poultry Processing Facilities — 19 States, April 2020. *Morbidity and Mortality Weekly Report* 2020; 69: 557-561.
- <sup>4</sup> KUCB (2020) Positive COVID-19 results grow to 92 aboard factory trawler. <https://www.kucb.org/post/positive-covid-19-results-grow-92-aboard-factory-trawler#stream/o>. Accessed 3 Feb 2021
- <sup>5</sup> D. Fisher, A. Reilly, A.K.E. Zheng, A.R. Cook, D.E. Anderson, Seeding outbreaks of COVID-19 by contaminated fresh and frozen food, *bioRxiv* (2020), 2020. 2008. 2017. 255166. <http://dx.doi.org/10.1101/2020.08.17.255166>.
- <sup>6</sup> Carraturo et al., Persistence of SARS-CoV-2 in the environment and COVID-19 transmission risk from environmental matrices and surfaces. *Environ Pollut.* 2020 Oct; 265: 115010.
- <sup>7</sup> Yeargin T et al., Key characteristics of foods with an elevated risk for viral enteropathogen contamination. *J Appl Microbiol.* 2019 4:996-1010. doi: 10.1111/jam.14113.
- <sup>8</sup> Zhang X-R. COVID-19 transmission in cold chain: A safe and green new-generation cold chain is demanded. *Int J Energy Res.* 2020;1–6. <https://doi.org/10.1002/er.6357>
- <sup>9</sup> Li Bai, Yeru Wang, Yibaina Wang, Yongning Wu, Ning Li, Zhaoping Liu. Controlling COVID-19 Transmission due to Contaminated Imported Frozen Food and Food Packaging[J]. *China CDC Weekly*, 2021, 3(2): 30-33. doi: 10.46234/ccdcw2021.008
- <sup>10</sup> The Joint Prevention and Control Mechanism of the State Council of the People's Republic of China. Technical guidance for prevention and control of COVID-19 in cold food production chain and Technical guidance for disinfection in cold food production chain to prevent and control of COVID 19: [2020]-245. [http://www.gov.cn/xinwen/2020-10/27/content\\_5555114.htm](http://www.gov.cn/xinwen/2020-10/27/content_5555114.htm). [2020-12-31]. (In Chinese)
- <sup>11</sup> The Joint Prevention and Control Mechanism of the State Council of the People's Republic of China. Work plan for preventive and comprehensive disinfection of imported cold-chain food: [2020]-255. [http://www.gov.cn/xinwen/2020-11/09/content\\_5559179.htm](http://www.gov.cn/xinwen/2020-11/09/content_5559179.htm). [2020-12-31]. (In Chinese)
- <sup>12</sup> Chen F, Zhu Y, Wu M, Ku X, Ye S, Li Z, Guo X, He Q. Comparative Genomic Analysis of Classical and Variant Virulent Parental/Attenuated Strains of Porcine Epidemic Diarrhea Virus. *Viruses*. 2015 Oct 23;7(10):5525-38. doi: 10.3390/v7102891. PMID: 26512689; PMCID: PMC4632399.
- <sup>13</sup> Peng Y, Zhou H, Li C, Jin M. [The rescue of H<sub>1</sub>N<sub>1</sub> subtype swine influenza virus]. *Sheng Wu Gong Cheng Xue Bao*. 2008 May;24(5):857-61. Chinese. PMID: 18724708.
- <sup>14</sup> Aydin M, Evrendilek F, Savas SA, Aydin IE, Evrendilek DE. Falling Dynamics of SARS-CoV-2 as a Function of Respiratory Droplet Size and Human Height. *J Med Biol Eng.* 2020 Oct 19:1-7. doi: 10.1007/s40846-020-00575-y. Epub ahead of print. PMID: 33100940; PMCID: PMC7571304.

---

<sup>15</sup> Jantafong T, Ruenphet S, Punyadarsaniya D, Takehara K. The study of effect of didecyl dimethyl ammonium bromide on bacterial and viral decontamination for biosecurity in the animal farm. *Vet World*. 2018 May;11(5):706-711. doi: 10.14202/vetworld.2018.706-711. Epub 2018 May 27. PMID: 29915512; PMCID: PMC5993774.

<sup>16</sup> Xu Linyun, Zhou Hongping, Gao Shaoyan. Effect of structure parameters of exhaust tube in steady fogger on thermal atomizing effect of hot fogging concentrate[J]. *Transactions of the Chinese Society of Agricultural Engineering (Transactions of the CSAE)*, 2014, 30(1): 40-46. (in Chinese with English abstract)

<sup>17</sup> Public Health Statement on Propylene Glycol. CAS#: 57-55-6.
